CORRECTION

# Correction: DeltaBreed: A BrAPI-centric breeding data information system

Shawn C. Yarnes, Nick Palladino, Dave J. Meidlinger, David R. Philips, Heather M. Sweeney, Shahana A. Mustafa, Matthew L. Mandych, Sam Bouabane, Tim E. Parsons, Tyler J. Slonecki, Dongyan Zhao, Trevor W. Rife, Bryan J. Ellerbrock, Chaney Courtney, Peter Selby, Lukas A. Mueller, Mirella Flores-Gonzalez, Johan S. Aparicio, Khaled Al-Sham'aa, Sebastian Raubach, Jean-Luc Jannink, Edward S. Buckler, Craig T. Beil, Moira J. Sheehan

The images for [Figs 2–7](#) and [9](#) and [10](#) are incorrectly switched. The image that appears as [Fig 6](#) should be [Fig 2](#), the image that appears as [Fig 4](#) should be [Fig 3](#), the image that appears as [Fig 5](#) should be [Fig 4](#), the image that appears as [Fig 7](#) should be [Fig 5](#), the image that appears as [Fig 2](#) should be [Fig 6](#), the image that appears as [Fig 3](#) should be [Fig 7](#), the image that appears as [Fig 10](#) should be [Fig 9](#) and the image that appears as [Fig 9](#) should be [Fig 10](#). The figure captions appear in the correct order. The authors have provided a corrected version of figures here.

## Reference

1. Yarnes SC, Palladino N, Meidlinger DJ, Philips DR, Sweeney HM, Mustafa SA, et al. DeltaBreed: A BrAPI-centric breeding data information system. PLoS One. 2025;20(12):e0324104. <https://doi.org/10.1371/journal.pone.0324104> PMID: [41385557](https://pubmed.ncbi.nlm.nih.gov/41385557/)

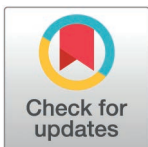

## OPEN ACCESS

**Citation:** Yarnes SC, Palladino N, Meidlinger DJ, Philips DR, Sweeney HM, Mustafa SA, et al. (2026) Correction: DeltaBreed: A BrAPI-centric breeding data information system. PLoS One 21(1): e0341691. <https://doi.org/10.1371/journal.pone.0341691>

**Published:** January 22, 2026

**Copyright:** © 2026 Yarnes et al. This is an open access article distributed under the terms of the [Creative Commons Attribution License](https://creativecommons.org/licenses/by/4.0/), which permits unrestricted use, distribution, and reproduction in any medium, provided the original author and source are credited.

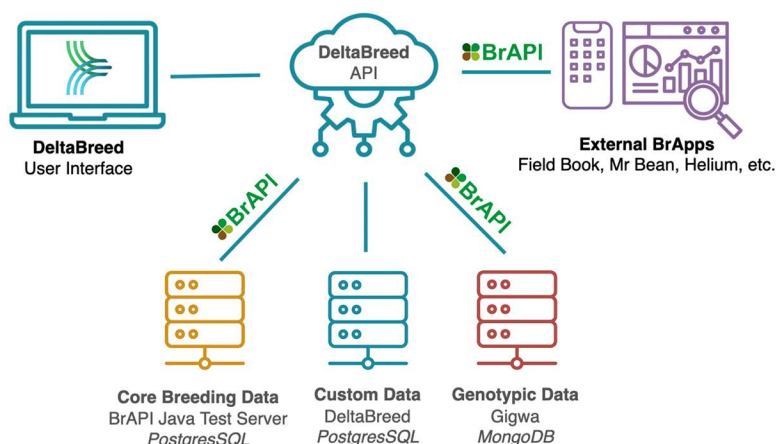

**Fig 2. DeltaBreed v1.0 modular software architecture.** Users can interact with DeltaBreed v1.0 data through the web interface and via external BrApps. REST APIs, primarily BrAPI, are used to communicate breeding data among various web services, including DeltaBreed-associated databases. DeltaBreed v1.0 communicates with two BrAPI databases and uses a custom database to handle data not supported by BrAPI, like user account management. Disparate data types are handled by connected subsystems with optimized data architectures suitable to the data storage needs. BrAPI logo republished under a CC BY license, with permission from Peter Selby, original copywrite 2016.

<https://doi.org/10.1371/journal.pone.0341691.g002>

Error(s) detected in file, Error Message Feature.xls. (See details below.) Import cannot proceed.

## Import File

Germplasm
Ontology
Experiments & Observations
Genotypic Data
Genotype Samples

### Importing...

**Before You Import...**  
Experimental germplasm and ontology terms must be created in the system before experiments can be created via import. See the import template for more information about data requirements. Importing phenotypic observations into existing experiments requires only Observation Unit IDs to match with the experimental design.

[Download the Experiments & Observations Import Template](#)  
Template version placeholder

Select workflow

Create new experiment

Choose a file...

**File contains data errors**

| Row | Field          | Error                                               |
|-----|----------------|-----------------------------------------------------|
| 3   | X length       | Non-numeric text detected detected                  |
| 4   | X Disease Rate | Undefined ordinal category detected                 |
| 6   | Germplasm GID  | A non-existing GID                                  |
| 6   | X Date         | Incorrect date format detected. Expected YYYY-MM-DD |
| 8   | X Disease Rate | Undefined ordinal category detected                 |
| 9   | Germplasm GID  | A non-existing GID                                  |
| 9   | X Disease Rate | Undefined ordinal category detected                 |

**Fig 3. A screenshot of DeltaBreed v1.0 experiment and observation file import module displaying data validation and error messaging.** DeltaBreed v1.0 has clear and actionable UI error messaging, as demonstrated in the experiment import module. Error messages appear as a banner across the top of the windowpane. In this example, there are several data errors detected in the Experiment and Observation import file. An error table indicates to users to the exact row(s) in the import file that needs correction.

<https://doi.org/10.1371/journal.pone.0341691.g003>

**DELTA BREED** ABC [dropdown] [user icon]

**Ontology Term** Active ☒

Term Type\*

Name\*

Full Name

Description\*

Synonyms

Tags  Start typing to see suggestions

Trait = Entity + Attribute = Plant Height

Entity\*

Attribute\*

Method = Description + Class = Meter Stick Measurement

Description

Class\*

Scale

Class\*

Note: additional options for this field will appear after selection

Unit\*

Can be any measurable unit.

Min  Enter integer value only.

Max  Enter integer value only.

Decimals  Leave blank for integer type.

☒ Save

**Fig 4. DeltaBreed v1.0 ontology module screenshot of a Plant Height observation variable.**

<https://doi.org/10.1371/journal.pone.0341691.g004>

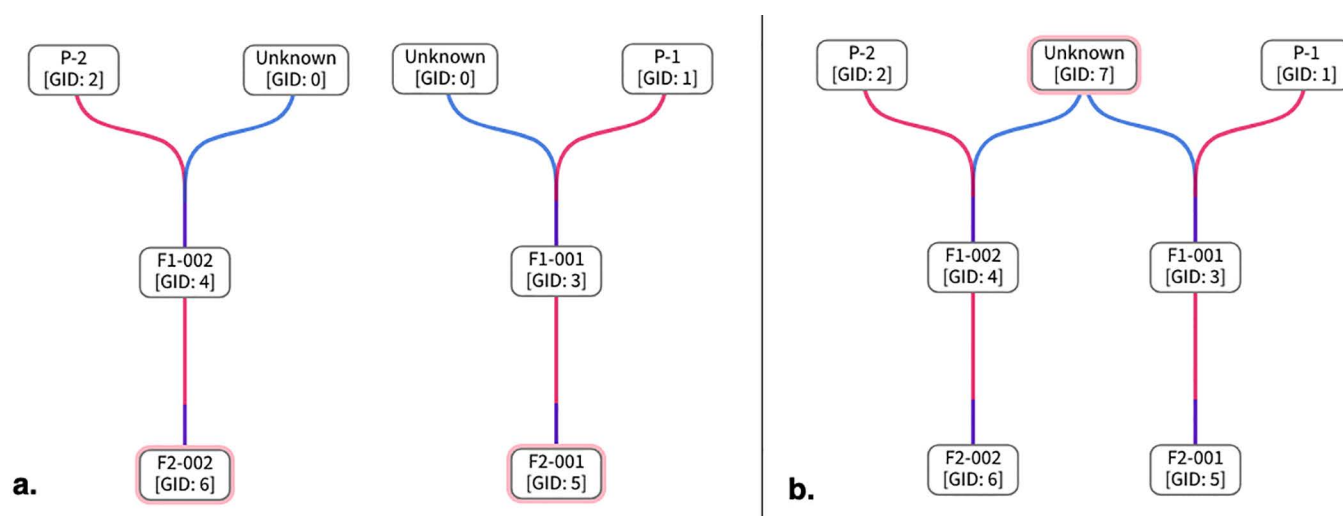

**Fig 5. Screenshots of DeltaBreed v1.0 pedigree viewer module when there is an unknown parent in germplasm records.**

<https://doi.org/10.1371/journal.pone.0341691.g005>

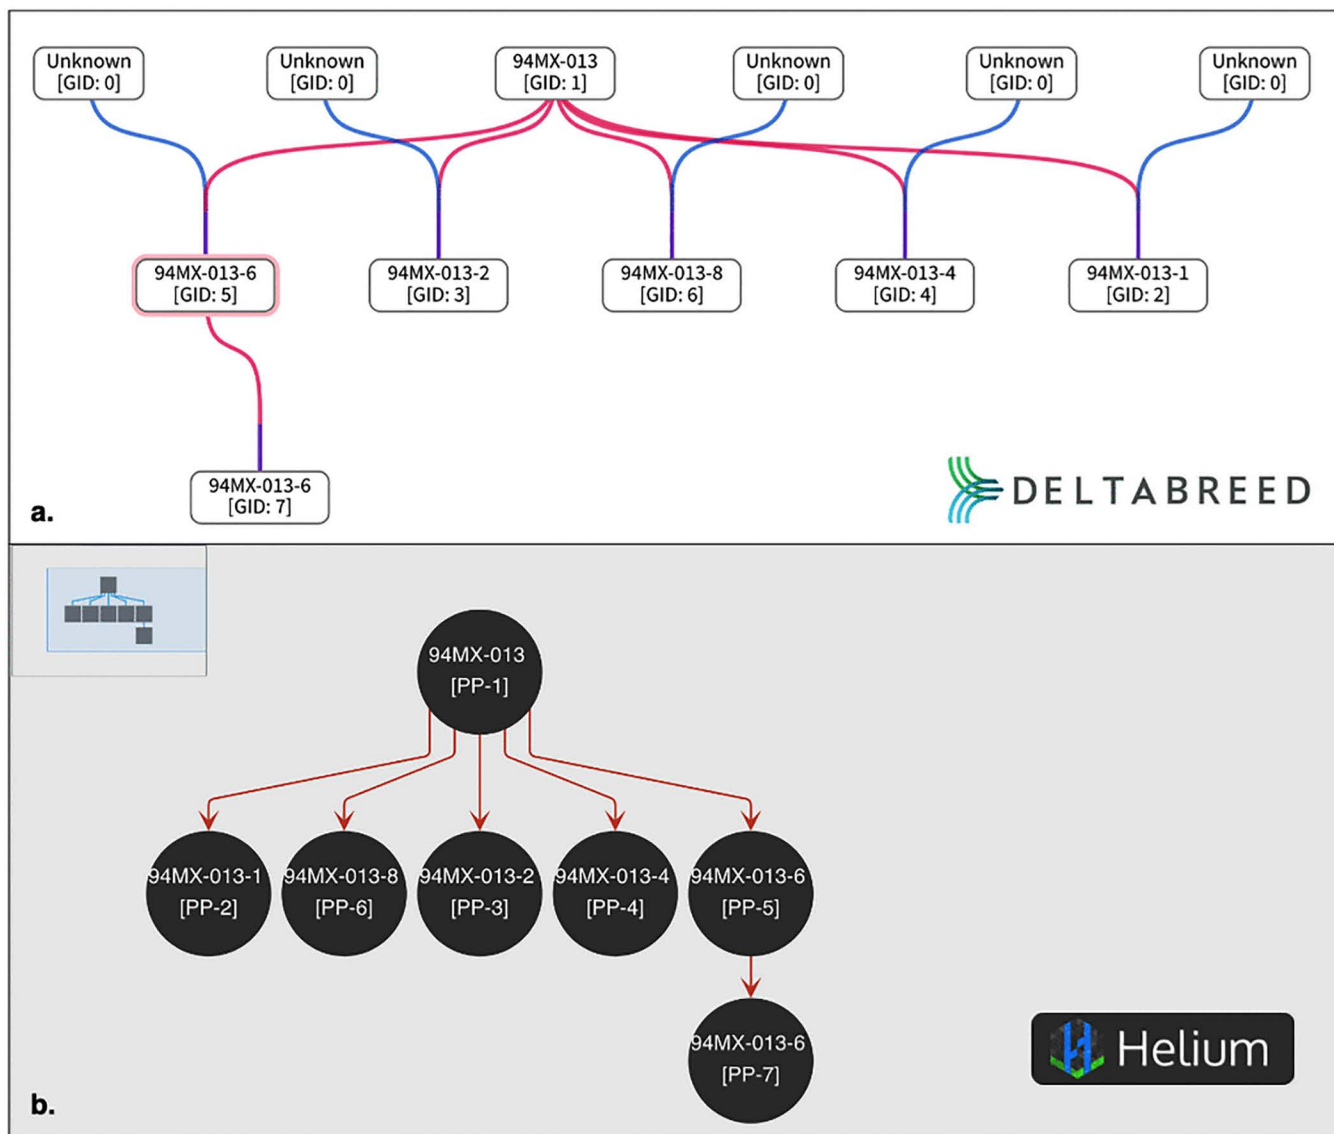

**Fig 6.** Screenshots of a pedigree view comparing DeltaBreed v1.0 and Helium for the same pecan individual.

<https://doi.org/10.1371/journal.pone.0341691.g006>

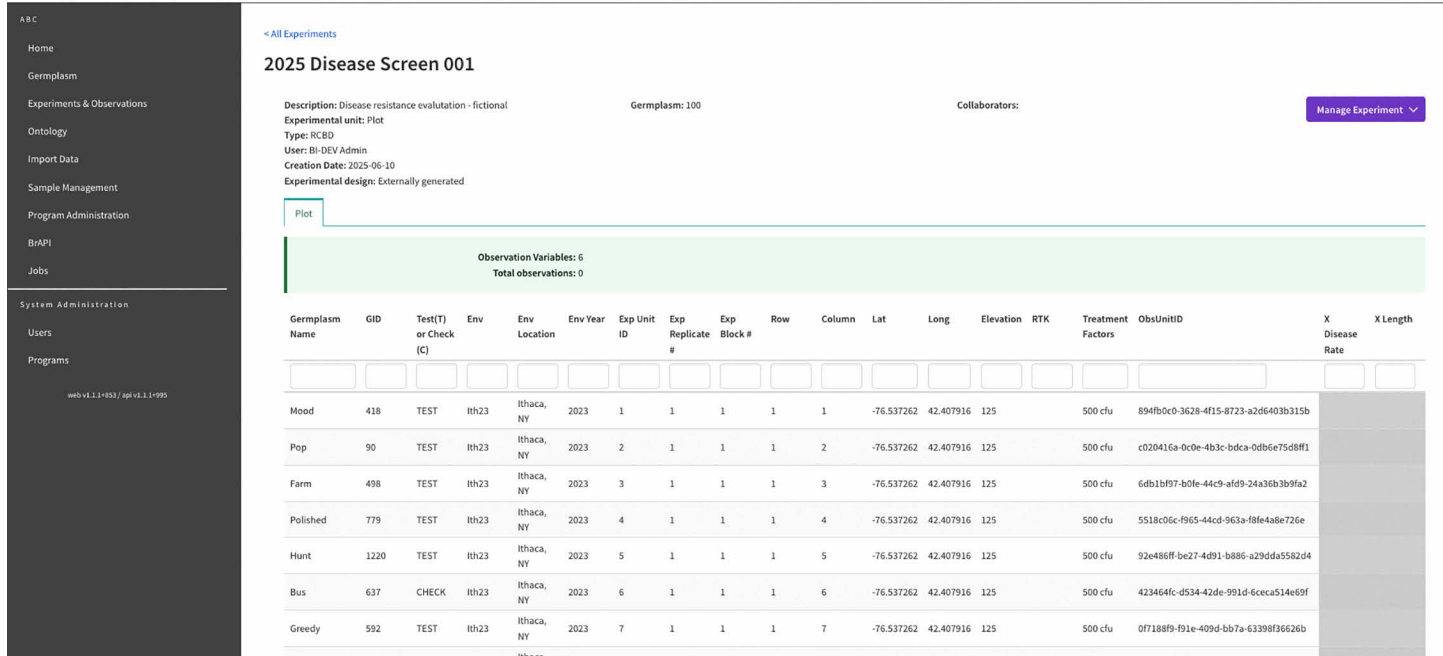

**Fig 7. Screenshot of DeltaBreed v1.0 experiments and observations user interface.** Displayed is an experiment view in DeltaBreed v1.0 before observations have been made (see S5 File for data). Each table row represents an observation unit, in this case a plot, with its unique ObsUnitID and associated human-readable germplasm record (GID). The grey cells represent pending observations with no recorded values. Experimental observation variables (e.g., "XLength") are defined in the DeltaBreed v1.0 ontology module.

<https://doi.org/10.1371/journal.pone.0341691.g007>

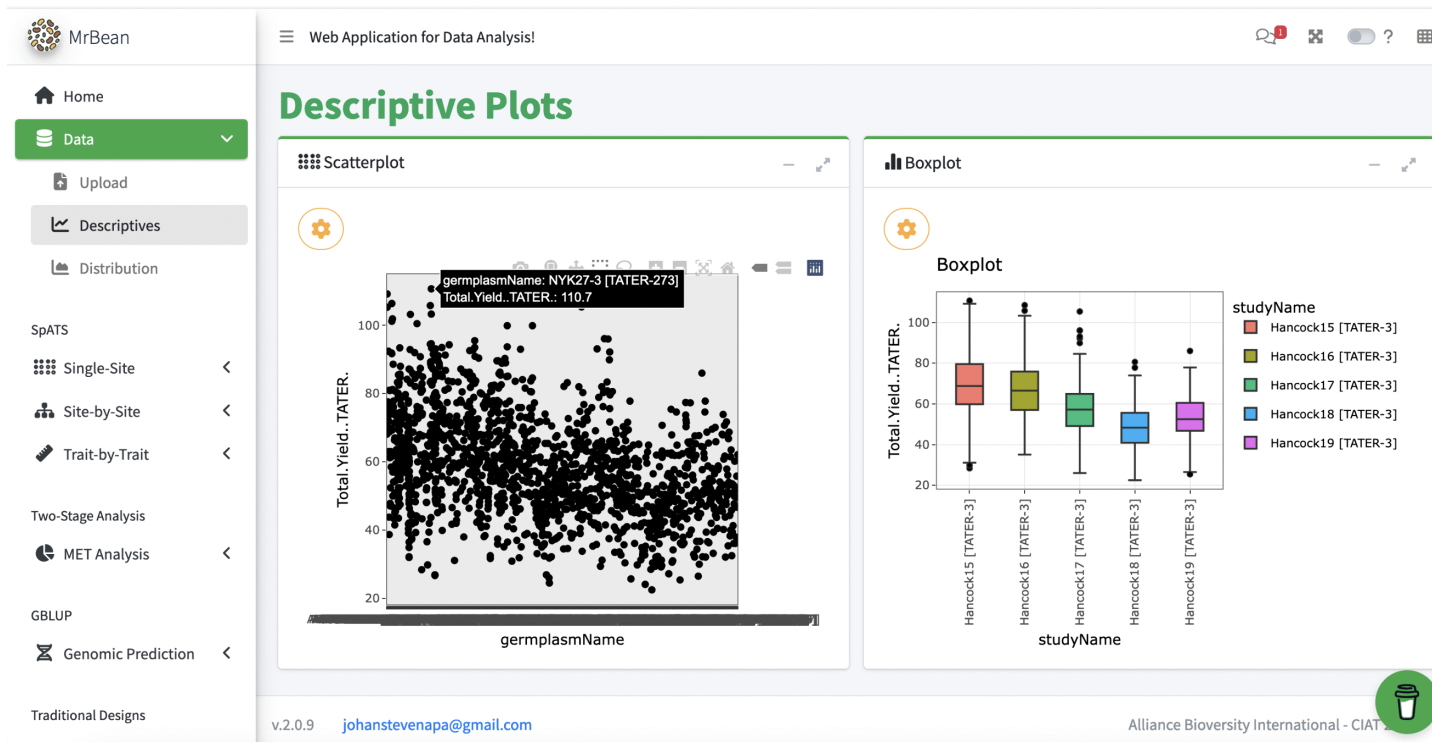

**Fig 9. Screenshot of MrBean's UI for descriptive plots using potato data pulled from DeltaBreed v1.0 via QBMS and BrAPI.** The center-left panel displays a scatterplot of all germplasm evaluated for total yield in the Vignette1 potato dataset [34]. The center-right panel displays a boxplot of total yield across five environments (the location "Hancock" across years 2015–2019). Notice in the scatter plot that the selected germplasmName is appended with program code and GID, [TATER-273]. Similarly, studyName in the boxplot is appended with program code and experiment ID. These appends are hidden from users on the DeltaBreed v1.0 UI and are artifacts of DeltaBreed v1.0 interoperability logic, also described with Helium integration (see Fig 4). See S6 File for data. MrBean logo republished under a CC BY license, with permission from Johan Aparicio, original copyright 2023.

<https://doi.org/10.1371/journal.pone.0341691.g009>

< All Germplasm

## Germplasm Details

Preferred Name: Dixi  
GID: 104  
Breeding Method: Unknown  
Source: UNK  
Pedigree:  
Pedigree GID(s):  
Synonyms:

External UID:  
User: BI-DEV Admin  
Creation Date: 2024-11-19

Pedigrees Genotype

Callsets: Dixi\_89.001\_S10.05-1-2024-11-19T20:46:05.737681

| Chromosome  | Position | Ref                                                                            | Alt(s)                                                                                                                                                                                                                                                                                                                               | Genotype(s)                                                                                                                                                                                                                                                                                                                          |
|-------------|----------|--------------------------------------------------------------------------------|--------------------------------------------------------------------------------------------------------------------------------------------------------------------------------------------------------------------------------------------------------------------------------------------------------------------------------------|--------------------------------------------------------------------------------------------------------------------------------------------------------------------------------------------------------------------------------------------------------------------------------------------------------------------------------------|
| VaccDscaff1 | 188466   | GACAGAGTACCAACCAATCTCTATCATCTGTACAGAGCTCAACCCATGAAATTTTGTCCCAAGTCCCGATTC       | GACAGAGTACCAACCAATCTCTATCATCTGTACAGAGCTCAACCCATGAAATTTTGTCCCAAGTCCCGATTC<br>GACAGAGTACCAACCAATCTCTATCATCTGTACAGAGCTCAACCCATGAAATTTTGTCCCAAGTCCCGATTC                                                                                                                                                                                 | GACAGAGTACCAACCAATCTCTATCATCTGTACAGAGCTCAACCCATGAAATTTTGTCCCAAGTCCCGATTC<br>GACAGAGTACCAACCAATCTCTATCATCTGTACAGAGCTCAACCCATGAAATTTTGTCCCAAGTCCCGATTC<br>GACAGAGTACCAACCAATCTCTATCATCTGTACAGAGCTCAACCCATGAAATTTTGTCCCAAGTCCCGATTC<br>GACAGAGTACCAACCAATCTCTATCATCTGTACAGAGCTCAACCCATGAAATTTTGTCCCAAGTCCCGATTC                         |
| VaccDscaff1 | 255524   | GACATGTAGTCTCAACTGCACCTTGGATGCCACCTGCTCTGTTTACACCAATCACTCCCAATGACCGAAGCATTTTCA | GACATGTAGTCTCAACTGCACCTTGGATGCCACCTGCTCTGTTTACACCAATCACTCCCAATGACCGAAGCATTTTCA<br>GACATGTAGTCTCAACTGCACCTTGGATGCCACCTGCTCTGTTTACACCAATCACTCCCAATGACCGAAGCATTTTCA<br>GACATGTAGTCTCAACTGCACCTTGGATGCCACCTGCTCTGTTTACACCAATCACTCCCAATGACCGAAGCATTTTCA<br>GACATGTAGTCTCAACTGCACCTTGGATGCCACCTGCTCTGTTTACACCAATCACTCCCAATGACCGAAGCATTTTCA | GACATGTAGTCTCAACTGCACCTTGGATGCCACCTGCTCTGTTTACACCAATCACTCCCAATGACCGAAGCATTTTCA<br>GACATGTAGTCTCAACTGCACCTTGGATGCCACCTGCTCTGTTTACACCAATCACTCCCAATGACCGAAGCATTTTCA<br>GACATGTAGTCTCAACTGCACCTTGGATGCCACCTGCTCTGTTTACACCAATCACTCCCAATGACCGAAGCATTTTCA<br>GACATGTAGTCTCAACTGCACCTTGGATGCCACCTGCTCTGTTTACACCAATCACTCCCAATGACCGAAGCATTTTCA |
| VaccDscaff1 | 332115   | CCCCAAGACCACTGAAAGTAAAGTACAAATAGCTTAAAGCTGAGGAGGATTTTCAGGAAGAAAGCAGTTTA        | CCCCAAGACCACTGAAAGTAAAGTACAAATAGCTTAAAGCTGAGGAGGATTTTCAGGAAGAAAGCAGTTTA<br>CCCCAAGACCACTGAAAGTAAAGTACAAATAGCTTAAAGCTGAGGAGGATTTTCAGGAAGAAAGCAGTTTA<br>CCCCAAGACCACTGAAAGTAAAGTACAAATAGCTTAAAGCTGAGGAGGATTTTCAGGAAGAAAGCAGTTTA                                                                                                        | CCCCAAGACCACTGAAAGTAAAGTACAAATAGCTTAAAGCTGAGGAGGATTTTCAGGAAGAAAGCAGTTTA<br>CCCCAAGACCACTGAAAGTAAAGTACAAATAGCTTAAAGCTGAGGAGGATTTTCAGGAAGAAAGCAGTTTA<br>CCCCAAGACCACTGAAAGTAAAGTACAAATAGCTTAAAGCTGAGGAGGATTTTCAGGAAGAAAGCAGTTTA<br>CCCCAAGACCACTGAAAGTAAAGTACAAATAGCTTAAAGCTGAGGAGGATTTTCAGGAAGAAAGCAGTTTA                             |

**Fig 10. Screenshot of DeltaBreed v1.1 prototype visualization of microhaplotypes in the germplasm record view for a blueberry accession called “Dixi”.** The Germplasm Details viewer shows the genotype of an autotetraploid blueberry ( $2n=4x=48$ ) accession called ‘Dixi’ [GID:104]. The accession was genotyped on the 3K DARtag Blueberry panel (Blackberry\_DARtag\_BI\_Cornell\_University (1.0), [9]) and microhaplotypes were discovered, curated, and displayed at each targeted locus (only 3 loci are shown in this example). At each marker locus, the “Ref” column shows the microhaplotype allele that matches the reference genome exactly for the target sequence and surrounding sequence, the “Alt(s)” column shows the microhaplotype allele that matches known alternative alleles at the target locus by design, and the “Genotype(s)” displays the four microhaplotypes detected at on each of the four homologous chromosomes at the indicated locus in the genome. The ‘Dixi’ cultivar harbors four copies of “Alt” alleles at locus VaccDscaff1\_188466, one copy of the “Ref” and three copies of the “Alt” alleles at locus VaccDscaff1\_255524, and three copies of “Ref” and one copy of the “Alt” alleles at locus VaccDscaff1\_332115.

<https://doi.org/10.1371/journal.pone.0341691.g010>
